# Supplementary material for: New Perspectives for Eye-Sparing Treatment Strategies in Primary Uveal Melanoma
Source: MDPI journal article supplement (doi:10.3390/cancers14010134), 2021-12-28
Supplement: s1 [file s1]

**Table S1.** Ongoing clinical trials investigating new treatment modalities for localized uveal melanoma. Clinical trials were searched on <https://www.clinicaltrials.gov> and <https://www.clinicaltrialsregister.eu> with terms “uveal melanoma” and “uveal melanoma treatment” on 10/15/2021.

| <b>Investigated treatment</b>                                                                                                                                  | <b>Clinical trial</b> | <b>Country</b> | <b>Phase</b>   |
|----------------------------------------------------------------------------------------------------------------------------------------------------------------|-----------------------|----------------|----------------|
| Autologous dendritic cells loaded with autologous tumor RNA                                                                                                    | NCT01983748           | Germany        | Phase 3        |
| Selumetinib-methyl ethyl ketone (MEK) inhibitor in patients with unresectable uveal melanoma                                                                   | NCT02768766           | USA            | Phase 1        |
| Pegylated arginine deiminase (ADI-PEG 20), combined with immunotherapy drugs nivolumab and ipilimumab in patients with unresectable uveal melanoma             | NCT03922880           | USA            | Phase 1        |
| Hypofractionated linear accelerator radiotherapy                                                                                                               | NCT00872391           | Austria        | Not-applicable |
| Endoresection or transpupillary thermotherapy when endoresection is not feasible in patients with large uveal melanoma                                         | NCT02874040           | France         | Not-applicable |
| Intravitreal injection of ICON-1 (human immuno-conjugate 1)                                                                                                    | NCT02771340           | USA            | Phase 1        |
| Stereotactic radiotherapy followed by intravitreal aflibercept injection                                                                                       | NCT03712904           | USA            | Phase 2        |
| Interferon alfa-2b with dacarbazine in patients with proven monosomy 3 and/or 8q amplification                                                                 | NCT01100528           | USA            | Phase 2        |
| Suprachoroidal administration of AU-011 (human papillomavirus virus-like particles conjugated with IR700 dye AU-011) in patients with small choroidal melanoma | NCT04417530           | USA            | Phase 2        |
| Light-activated AU-011 in patients with small choroidal melanoma                                                                                               | NCT03052127           | USA            | Phase 1B/2     |
| Ziv-aflibercept (VEGF blocker) in patients with inoperable uveal melanoma                                                                                      | NCT00450255           | USA            | Phase 2        |

|                                                                                                                                                                            |                |         |         |
|----------------------------------------------------------------------------------------------------------------------------------------------------------------------------|----------------|---------|---------|
| Autologous dendritic cells loaded with autologous tumor RNA in patients with proven monosomy 3 after surgical resection of uveal melanoma to prolong disease-free survival | 2007-007847-28 | Germany | Phase 3 |
|----------------------------------------------------------------------------------------------------------------------------------------------------------------------------|----------------|---------|---------|
